# Supplementary material for: Determination of saccharides in aerosols by hydrophilic interaction liquid chromatography-evaporative light scattering detection after preconcentration/clean-up on magnetic titania
Source: Royal Society of Chemistry journal article supplement (doi:10.1039/c3ay26613c), 2013-01-01
Supplement: c3ay26613c.pdf [file c3ay26613c.pdf]

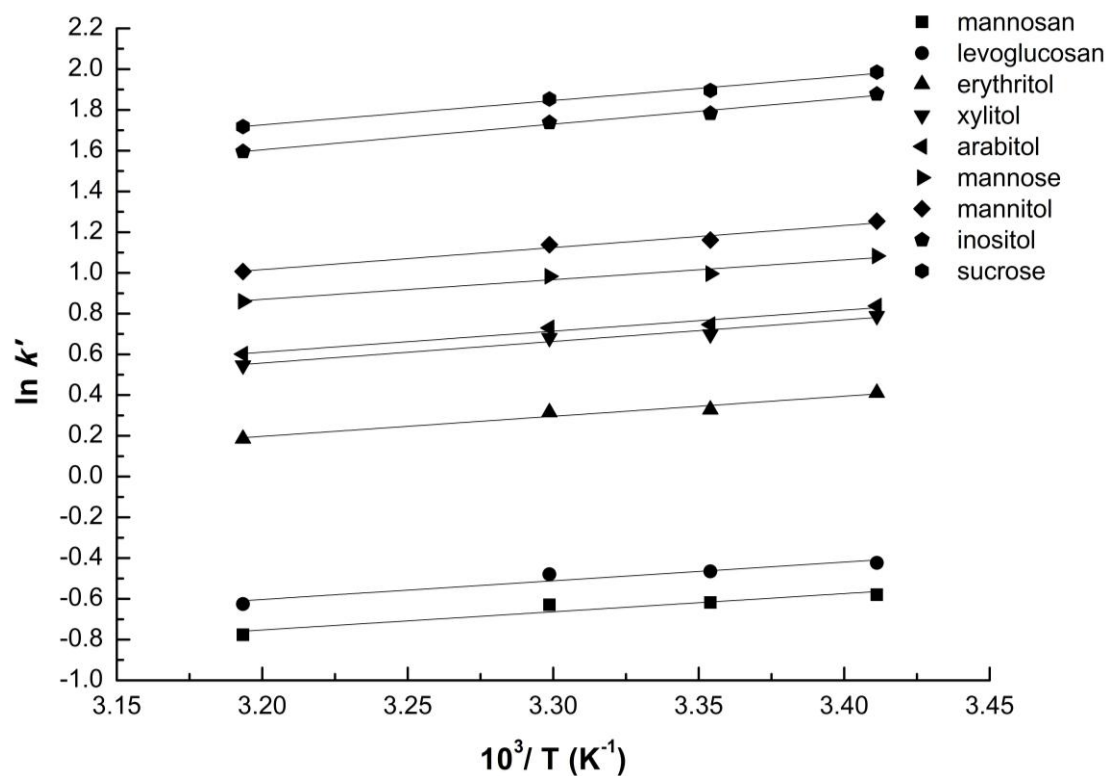

Van't Hoff plots in the temperature range of 20-40°C. Mobile phase: ACN/water 90/10 (v/v) in formic acid 10mM. Chromatographic column: HILIC-diol.

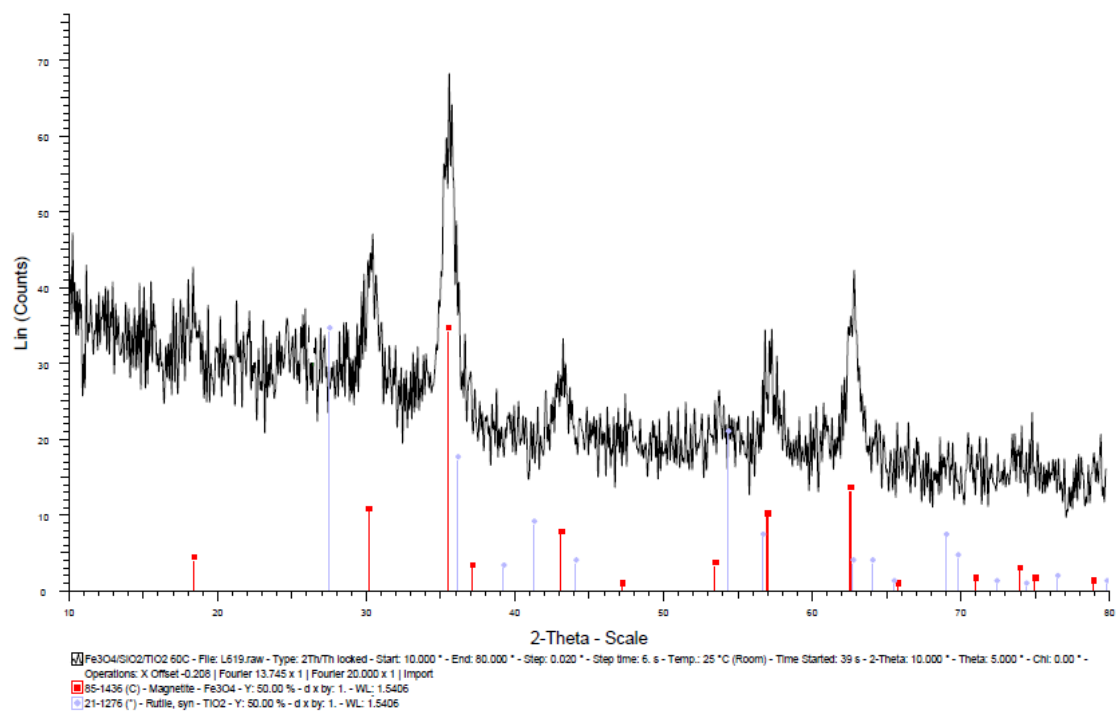

XRD of iron oxide/silica/titania material
